# Supplementary material
Source: publisher figshare collection journal article supplement (https://tandf.figshare.com/ndownloader/files/17939009)
Supplement: Supplementary file 1 [file 17939009]

**Appendices**

**Appendix 1:** A copy of the questionnaire as displayed to respondents on the custom-built website.


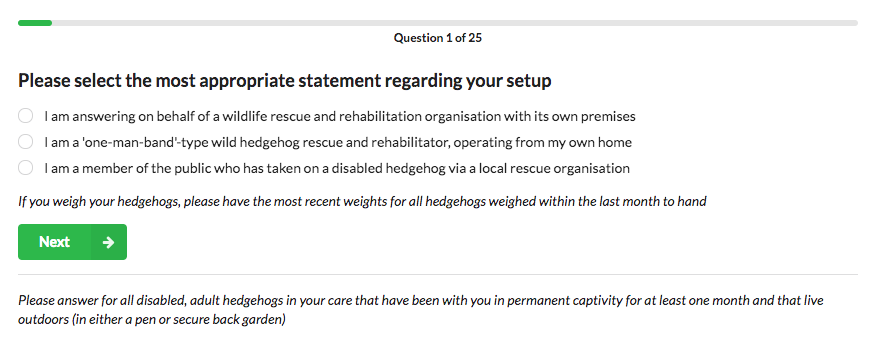


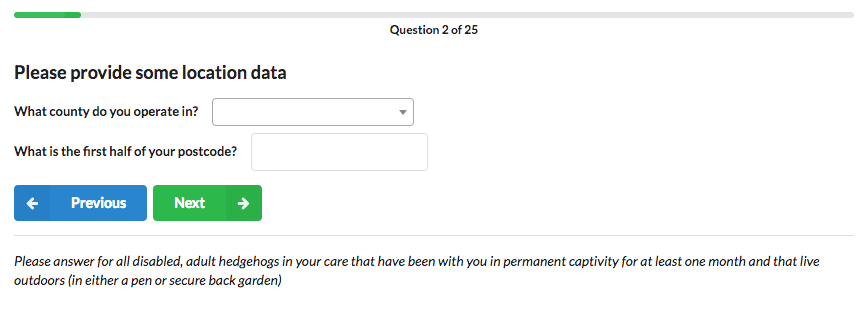


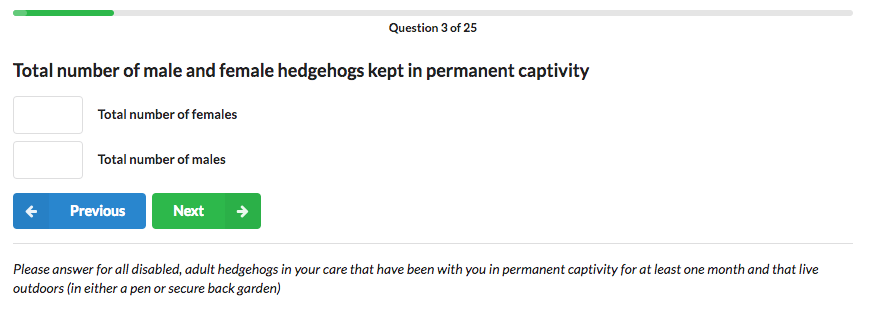


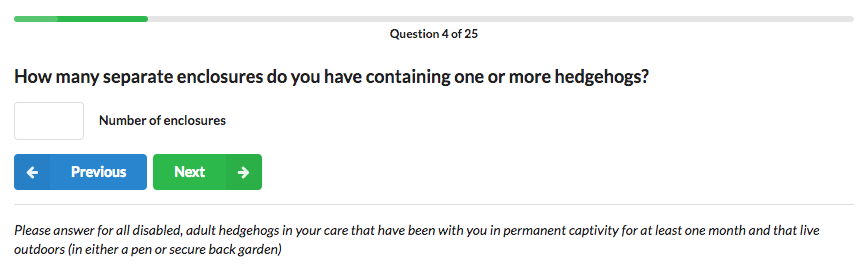


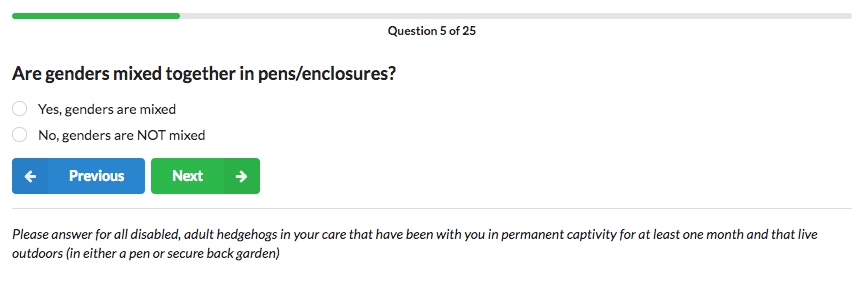


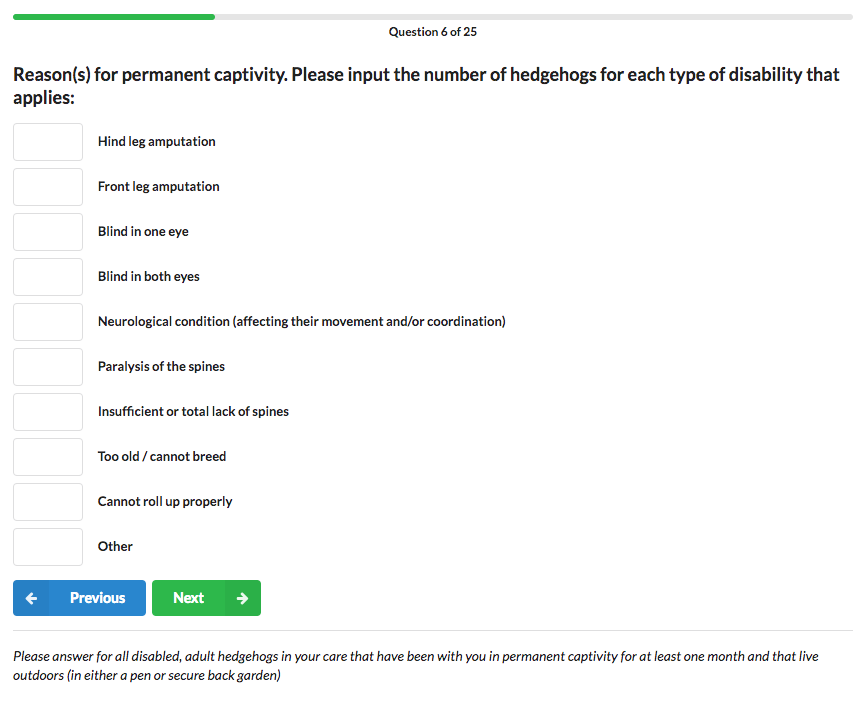


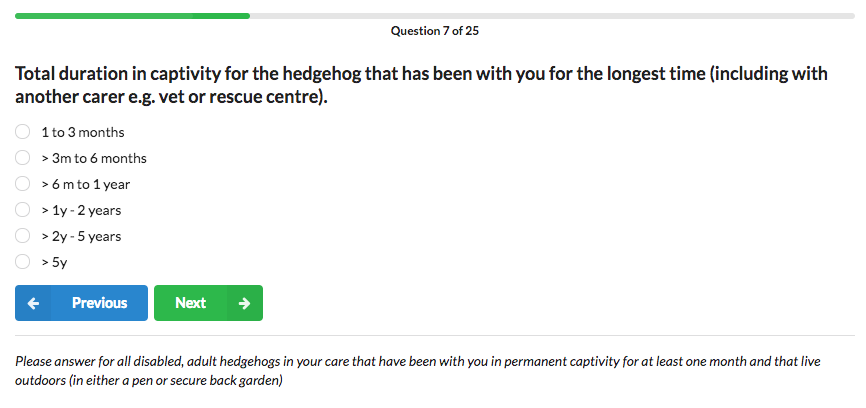


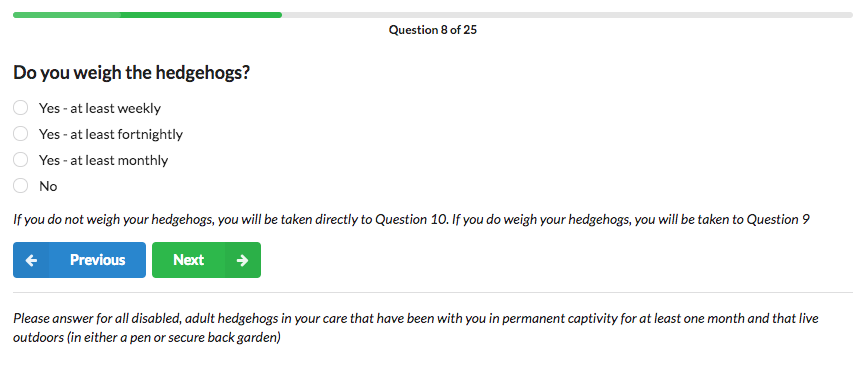


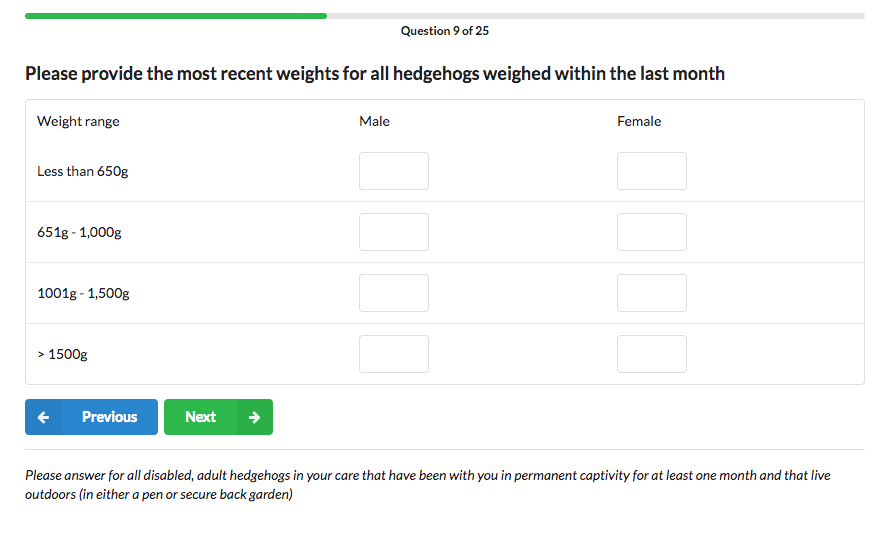


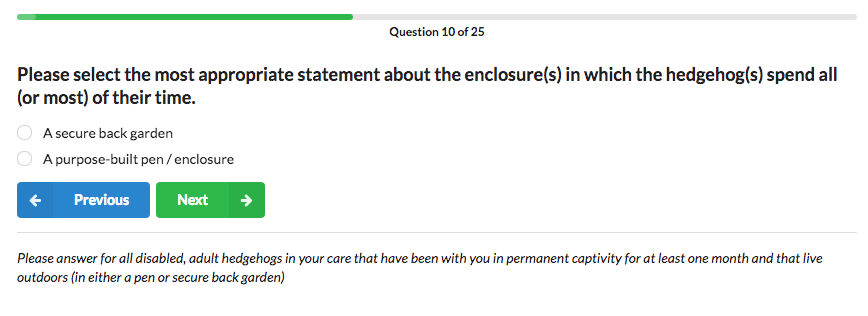


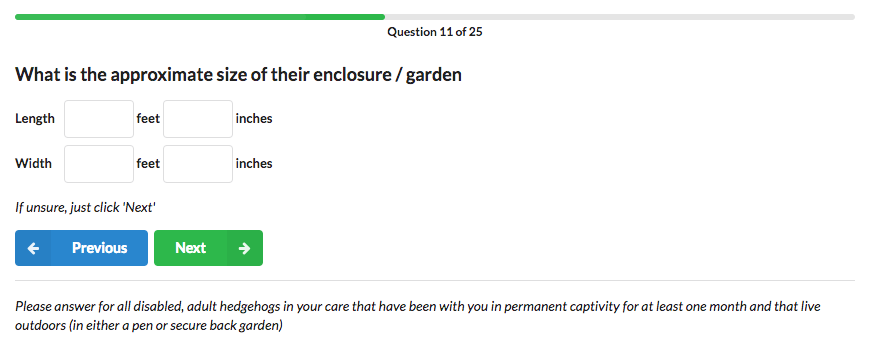


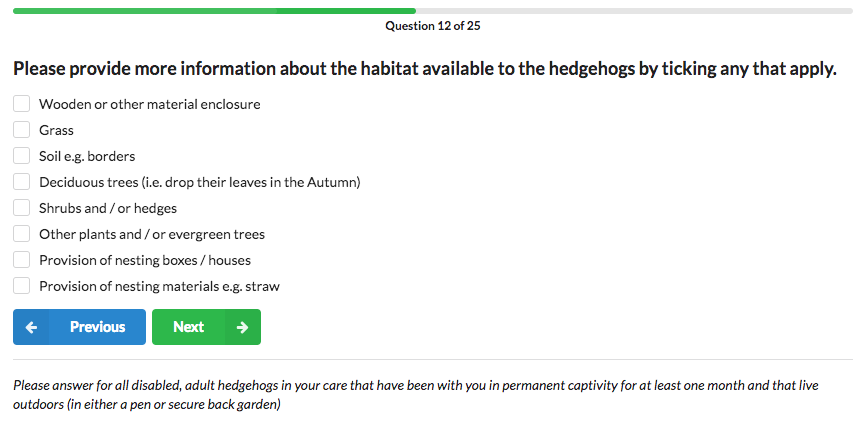


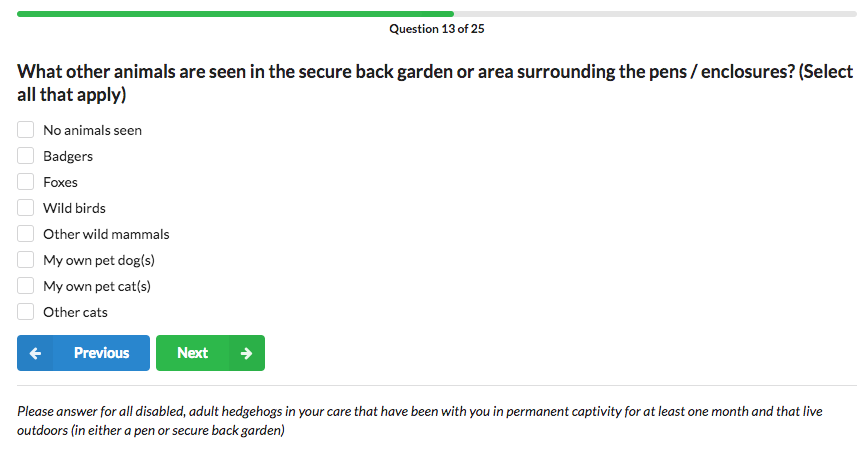


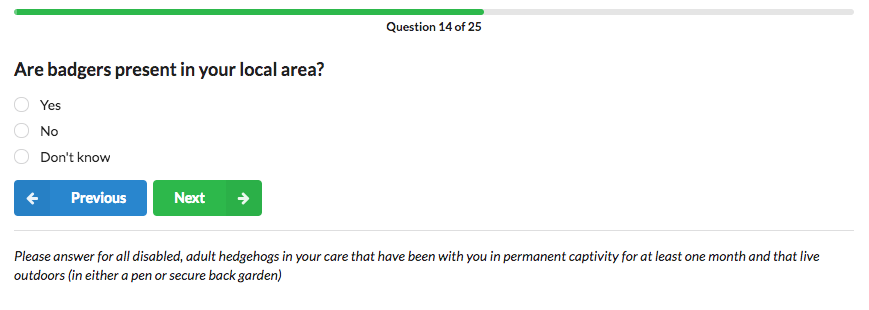


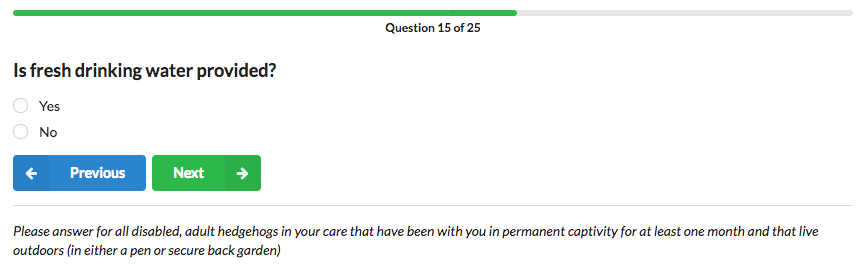


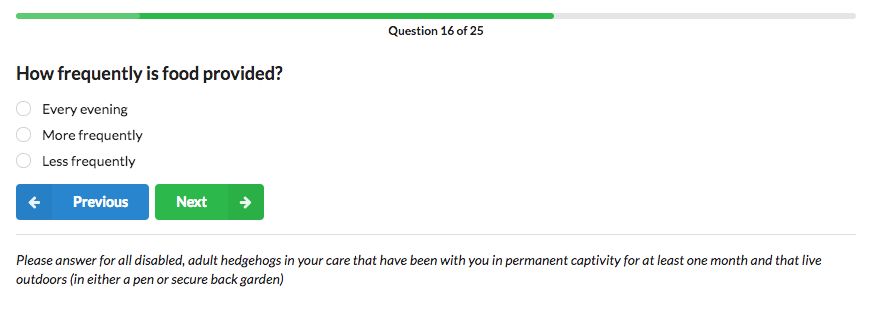


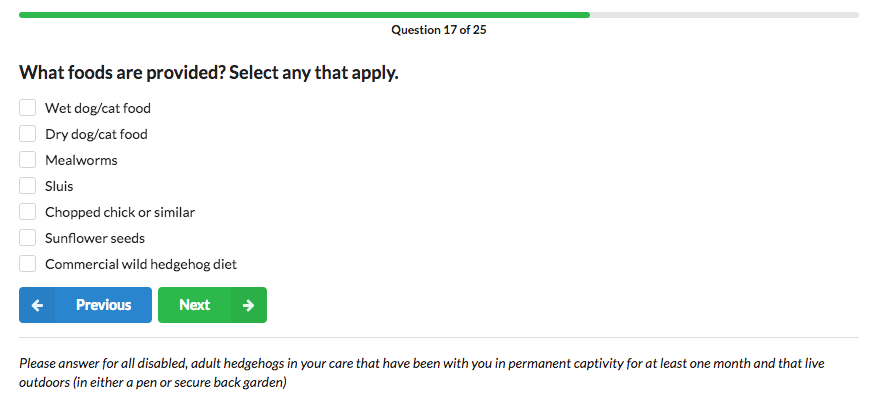


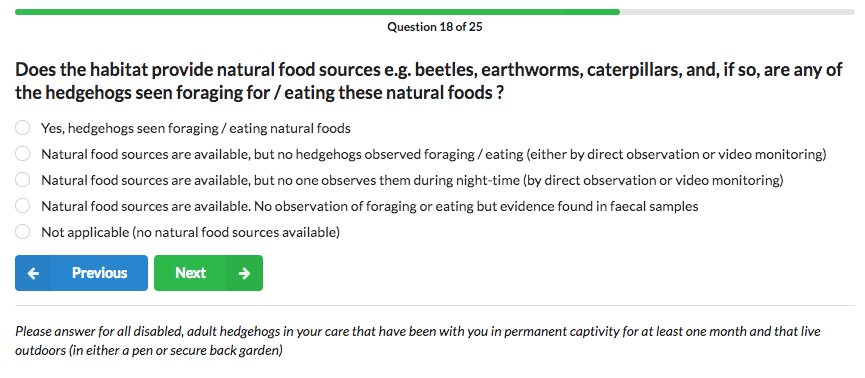


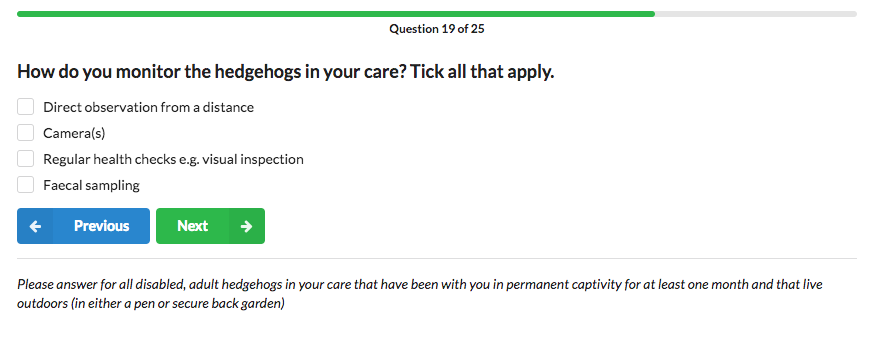


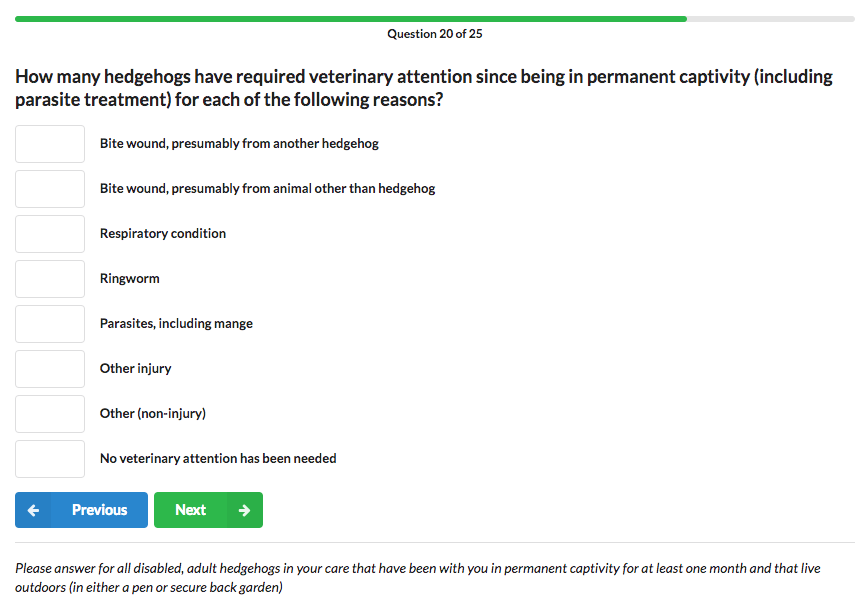


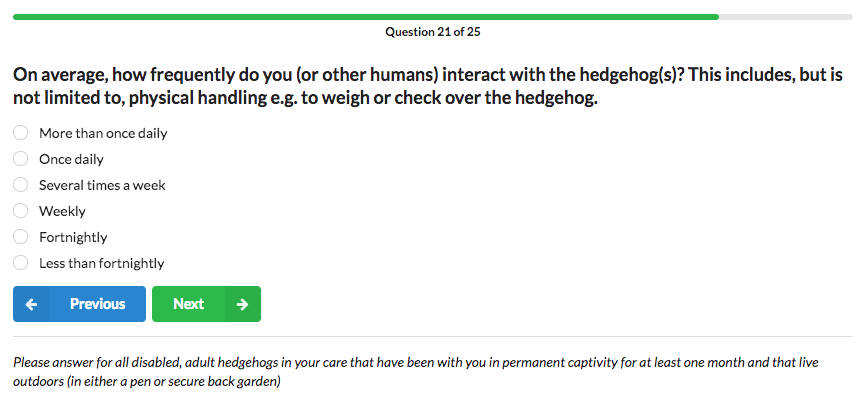


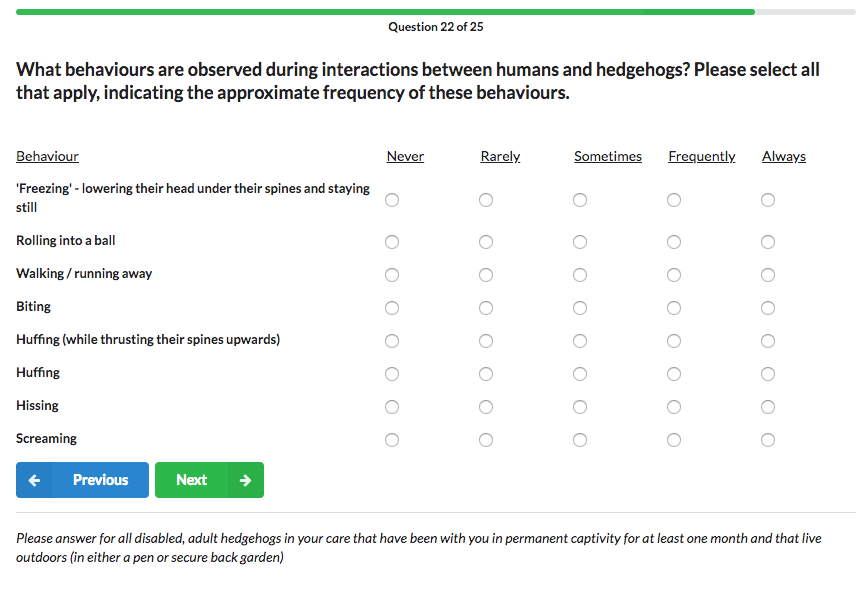


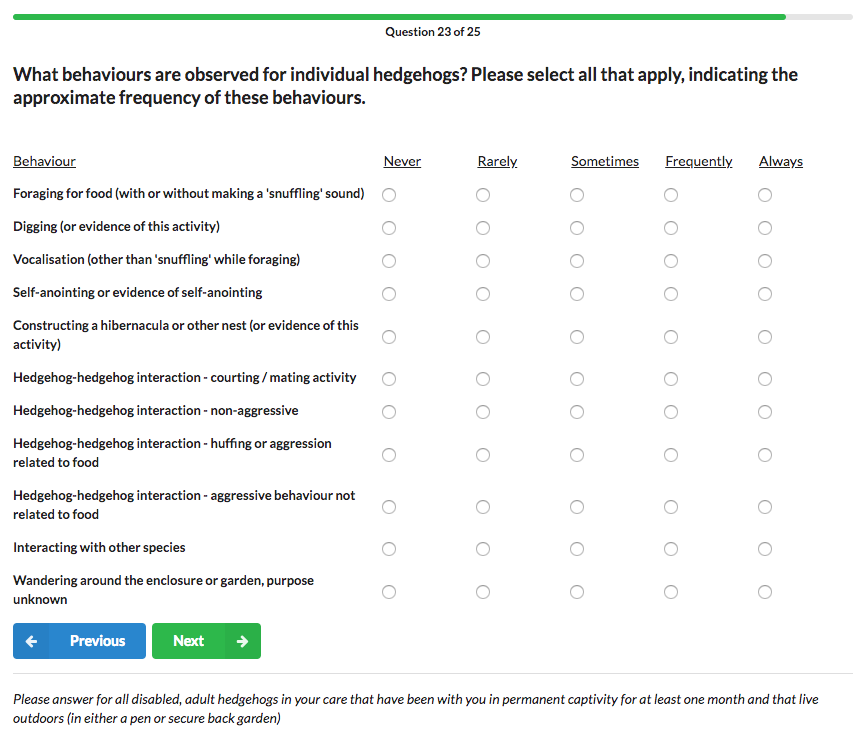


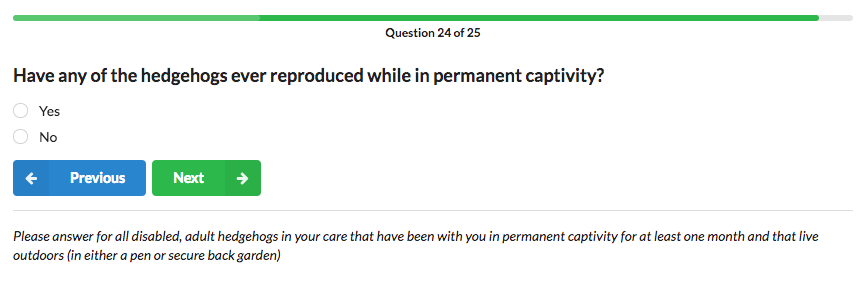


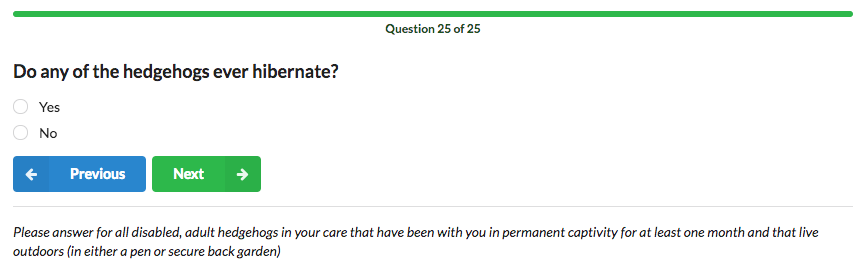


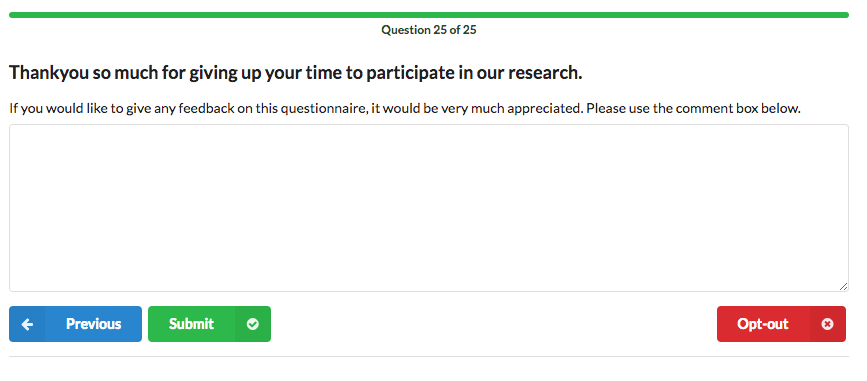
**Appendix 2:** Ethogram

The ethogram constructed for hedgehog behaviours was split into 3 categories: behaviours observed (i) during interactions with humans (‘Human interaction’); (ii) while not interacting with other animals (‘Individual’); and (iii) during interactions with other animals (‘Interaction (non-human)’).

| Behavior | Category | Description |
| --- | --- | --- |
| Freezinga | Human interaction | Lowering the head under their spines and staying still, spines erect |
| Ballinga, b | Human interaction | Rolling into a ball |
| Walking / running awaya, b | Human interaction | Walking / running away |
| Bitingb | Human interaction | Biting |
| Spine-huffinga | Human interaction | Making a ‘huffing’ sound while thrusting their spines upwards |
| Huffinga | Human interaction | Making a ‘huffing’ sound |
| Hissinga | Human interaction | Making a ‘hissing’ sound |
| Screaminga, b | Human interaction | Making a high-pitched sound akin to a scream or a squealb |
| Foragingb | Individual | Foraging for food, with or without making a ‘snuffling’ sound |
| Diggingb | Individual | Digging, or evidence of this activity |
| Vocalizingb | Individual | Vocalization other than the ‘snuffling’ sound made while foraging |
| Self-anointingb | Individual | Self-anointing (or evidence thereof). This behavior involves a hedgehog using its tongue to flick foamy saliva over their spines (and sometimes their fur)b |
| Nestingb | Individual | Constructing a hibernacula or other nest (or evidence of this activity) |
| Wandering | Individual | Wandering around the enclosure or garden with no obvious purpose |
| Courting / matingb | Interaction (non-human) | Hedgehog-hedgehog: courting / mating activity |
| Non-aggressive hog-hoga | Interaction (non-human) | Hedgehog-hedgehog: non-aggressive interaction |
| Food aggression hog-hoga | Interaction (non-human) | Hedgehog-hedgehog: huffing or aggression related to food |
| Non-food aggression hog-hoga | Interaction (non-human) | Hedgehog-hedgehog: aggressive behaviour not related to food |
| Other species | Interaction (non-human) | Hedgehog interacting with another species |

a Reeve, 1994

b Morris, 2006
